# Supplementary material
Source: Springer Nature journal article supplement (https://www.springermedizin.de/resource/supplementary/12885_2013_4033_MOESM3_ESM.pdf/9465066)
Supplement: MOESM3 [file 9465066]

| <b>Locus</b> | <b>Primer ID</b>         | <b>Sequence 5' - 3'</b>                                        | <b>Amplicon mapping</b>       |
|--------------|--------------------------|----------------------------------------------------------------|-------------------------------|
| SEPT9_Amp 1  | S9_reg1_F<br>S9_reg1_R   | TGTGGAGGGGTTTAGGTGT<br>AATACCCCCTTCTCAACACA                    | chr17:75,242,851..75,243,008  |
| SEPT9_Amp 2  | S9_reg2_F<br>S9_reg2_R   | TGGAGATTTAAGGATATTTAAGTAGAGA<br>ACACCTATCCTACTACTTTTCTAATAATCA | chr17:75,276,696..75,276,963  |
| SEPT9_Amp 3  | S9_reg3_F<br>S9_reg3_R   | GTTGGGGTATAGGGTGAAGAA<br>CAACTCACAAAATCAAATTCCTAA              | chr17:75,315,725..75,315,893  |
| SEPT9_Amp 4  | S9_reg4_F<br>S9_reg4_R   | TGGTGGGGGTGTTAGTTGT<br>ACAACCAAACAAAATTCTCTATCAC               | chr17:75,368,814..75,369,020  |
| SEPT9_Amp 5  | S9_reg5_F<br>S9_reg5_R   | TTTATTTAGTTGAGTTAGGGGGTTTA<br>AACCCAACACCCACCTTC               | chr17:75,369,420..75,369,648  |
| SEPT9_Amp 6  | S9_reg6_F<br>S9_reg6_R   | TATTTAGGTTTGGGGATATTTTTATT<br>AAACCATTATATAAACTTCCCCTTC        | chr17:75,370,258..75,370,549  |
| SEPT9_Amp 7  | S9_reg7_F<br>S9_reg7_R   | TTTGTGTGAAGATTATATGGGTTA<br>AATTCCTCCCCACCTT                   | chr17:75,372,308..75,372,507  |
| SEPT9_Amp 8  | S9_reg8_F<br>S9_reg8_R   | GATTATAAAGTTTTTTGATTTTTTGT<br>CACCCCTCCTAAAAACC                | chr17:75,447,506..75,447,783  |
| SFRP1        | SFRP1_F<br>SFRP1_R       | GGGGAATTTGTTATATTTAAGTATTT<br>ACACCAAATCTTCTCTACTC             | chr8:41,166,196..41,166,356   |
| NEUROG1      | NEUROG1_F1<br>NEUROG1_R1 | TGGAGTAAGTTTTGGGTAGGTT<br>CCTACAACCTACATCTAACTCTAA             | chr5:134,870,698..134,870,971 |
| RASSF2       | RASSF2_F<br>RASSF2_R     | CAATCTCCCTATAAAACCACTAACA<br>GGATTTTTTAGAGGTAGGTTTTAGTTT       | chr20:4,803,171..4,803,473    |
| VIM          | VIM_F<br>VIM_R           | AAATCCAATCCTCTACCACTCT<br>GGATTTGGTGGATATGGTTG                 | chr10:17,271,267..17,271,436  |
| LIMK1        | LIMK1_F1<br>LIMK1_R1     | GGTTTATAGGGTTTTTTAGTTTTG<br>CCTTCATTCATTCTCTTTCTC              | chr7:73,497,710..73,497,919   |
